# Supplementary material for: A Meta-Analysis of Observational Studies on Prolactin Levels in Women with Polycystic Ovary Syndrome
Source: MDPI journal article supplement (doi:10.3390/diagnostics12122924), 2022-11-23
Supplement: s1 [file s1]

**Supplementary Table S1.** Quality assessment of included studies using the Newcastle–Ottawa Quality Assessment Scale for cross-sectional study.

| Author                   | SELECTION                         |             |                |                                             | COMPARABILITY                                                                | OUTCOME                                                                                                        |                  | Total scores |
|--------------------------|-----------------------------------|-------------|----------------|---------------------------------------------|------------------------------------------------------------------------------|----------------------------------------------------------------------------------------------------------------|------------------|--------------|
|                          | Representativeness of the samples | Sample size | Non-responders | Ascertainment of the exposure (risk factor) | A: study controls for age and/or BMI<br>B: control for any additional factor | Assessment of the outcome<br>a) Independent blind assessment. **<br>b) Record linkage. **<br>c) Self report. * | Statistical test |              |
| Mahboobifard et al, 2021 | *                                 | *           | *              | *                                           | *                                                                            | **                                                                                                             | *                | 8            |
| Salem et al, 2015        | *                                 | *           |                |                                             |                                                                              | **                                                                                                             | *                | 5            |
| Yasar et al, 2022        | *                                 |             |                | *                                           | **                                                                           | **                                                                                                             | *                | 7            |
| Sahmay et al, 2013       |                                   | *           |                | *                                           | **                                                                           | *                                                                                                              | *                | 6            |
| Yang, 2020               | *                                 |             | *              | *                                           |                                                                              | *                                                                                                              | *                | 5            |
| Glintborg et al. 2014    |                                   | *           |                | *                                           | *                                                                            | **                                                                                                             | *                | 6            |
| Jiang et al, 2021        |                                   | *           | *              | *                                           | *                                                                            | *                                                                                                              | *                | 6            |
| Noroozzadeh et al. 2016  | *                                 | *           | *              | *                                           | *                                                                            | **                                                                                                             | *                | 8            |
| Yang, 2021               |                                   | *           | *              | *                                           | **                                                                           | **                                                                                                             | *                | 8            |
| Güdücü et al, 2012       |                                   | *           | *              | *                                           | *                                                                            | **                                                                                                             | *                | 7            |

**Supplementary Table S2.** Quality assessment of included studies using the Newcastle–Ottawa Quality Assessment Scale for case-control study.

|                   | SELECTION       |                                 |                       |                        | COMPARABILITY                                                                | EXPOSURE                  |                                                     |                   | Total scores |
|-------------------|-----------------|---------------------------------|-----------------------|------------------------|------------------------------------------------------------------------------|---------------------------|-----------------------------------------------------|-------------------|--------------|
| Author            | case definition | Representativeness of the cases | Selection of Controls | Definition of Controls | A: study controls for age and/or BMI<br>B: control for any additional factor | Ascertainment of exposure | Same method of ascertainment for cases and controls | Non-Response rate |              |
| Calzada, 2019     | *               |                                 |                       | *                      | *                                                                            | *                         | *                                                   |                   | 5            |
| Katulski, 2014    | *               |                                 |                       | *                      | **                                                                           | *                         | *                                                   |                   | 6            |
| Erol, 2017        | *               |                                 |                       | *                      | *                                                                            | *                         | *                                                   | *                 | 6            |
| Khashchenko, 2020 | *               |                                 |                       | *                      | *                                                                            | *                         | *                                                   | *                 | 6            |
| He et al, 2020    | *               |                                 |                       | *                      | **                                                                           | *                         | *                                                   | *                 | 7            |
| Oncul 1, 2020     | *               |                                 |                       | *                      | **                                                                           | *                         | *                                                   | *                 | 7            |
| Sharif, 2017      | *               |                                 |                       | *                      | **                                                                           | *                         | *                                                   | *                 | 7            |
| Panidis, 2005     | *               |                                 |                       | *                      | *                                                                            | *                         | *                                                   | *                 | 6            |
| Piouka,2009       | *               |                                 |                       | *                      | *                                                                            | *                         | *                                                   | *                 | 6            |
| Yilmaz , 2015     | *               |                                 |                       | *                      | *                                                                            | *                         | *                                                   |                   | 5            |
| Arpaci,2018       | *               |                                 |                       | *                      | *                                                                            | *                         | *                                                   | *                 | 6            |
| Yue, 2018         | *               |                                 |                       | *                      | *                                                                            | *                         | *                                                   | *                 | 6            |
| Banaszewska,2020  | *               |                                 |                       | *                      | **                                                                           | *                         | *                                                   | *                 | 7            |
| Zohrabi,2017      | *               |                                 |                       | *                      | **                                                                           | *                         | *                                                   |                   | 6            |
| de-Medeiros,2017  | *               |                                 |                       | *                      | *                                                                            |                           | *                                                   | *                 | 5            |
| Wang,2008         | *               |                                 |                       | *                      | *                                                                            | *                         | *                                                   | *                 | 6            |
| Özcan,2012        | *               |                                 |                       | *                      | *                                                                            | *                         | *                                                   | *                 | 6            |
| Rahmani,2018      | *               |                                 |                       | *                      | **                                                                           | *                         | *                                                   | *                 | 7            |
| Topcu, 2006       | *               |                                 |                       | *                      | **                                                                           | *                         | *                                                   | *                 | 7            |
| Su et al, 2011    | *               |                                 |                       | *                      | **                                                                           | *                         | *                                                   | *                 | 7            |

**Supplementary Table S3:** Quality assessment of studies included using the Newcastle–Ottawa Quality Assessment Scale for cohort studies

|                          | SELECTION                                |                                     |                           |                                          | COMPARABILITY                                                                       | OUTCOME                                                                                                                |                                    |                                  | Total scores |
|--------------------------|------------------------------------------|-------------------------------------|---------------------------|------------------------------------------|-------------------------------------------------------------------------------------|------------------------------------------------------------------------------------------------------------------------|------------------------------------|----------------------------------|--------------|
| Item<br><br>Author, Year | Representativeness of the exposed cohort | Selection of the non-exposed cohort | Ascertainment of exposure | No outcome of interest at start of study | A: Study controls for age and/or BMI<br><br>B: Study controls for other confounders | A: doctor's diagnosis OR objective measurements<br><br>B: parent/self-reported doctor's diagnosis OR use of medication | Follow-up long enough for outcomes | Adequacy of follow up of cohorts |              |
| Kim,2022                 |                                          | *                                   |                           | *                                        | **                                                                                  | *                                                                                                                      | *                                  | *                                | 8*           |
| Rashidi,2016             |                                          | *                                   | *                         | *                                        | *                                                                                   | *                                                                                                                      | *                                  | *                                | 7*           |
